# Supplementary material for: Dietary inclusion of nitrite-containing frankfurter exacerbates colorectal cancer pathology and alters metabolism in APCmin mice
Source: PubMed Central journal article supplement (PMC9797476; doi:10.1038/s41538-022-00174-y), 2022-12-28
Supplement: 41538_2022_174_MOESM1_ESM.pdf [file 41538_2022_174_MOESM1_ESM.pdf]

*Dietary inclusion of nitrite-containing frankfurter exacerbates colorectal cancer pathology, alters metabolism and causes gut dybiosis in APCmin mice.” Crowe et al.*

**Supplementary Table 2: Proximal nutritional analysis of the modified chow diets consumed in the study.**

| Analyte / Diet                            | Frankfurter | Pork  | Sausage | Control |
|-------------------------------------------|-------------|-------|---------|---------|
| <b>Sodium nitrate mg/Kg</b>               | 24.6        | 31.9  | <21     | 25.3    |
| <b>Potassium nitrate mg/Kg</b>            | 29.3        | 38    | <25     | 30.1    |
| <b>Sodium nitrite mg/Kg</b>               | <22.5       | <22.5 | <22.5   | <22.5   |
| <b>Potassium nitrite mg/Kg</b>            | <27.7       | <27.7 | <27.7   | <27.7   |
| <b>Fat g/100g</b>                         | 8.4         | 6.2   | 8.2     | 3.5     |
| <b>Moisture g/100g</b>                    | 9.3         | 8.3   | 8.3     | 7       |
| <b>Ash g/100g</b>                         | 2.9         | 2.7   | 2.7     | 2.6     |
| <b>Sodium g/100g</b>                      | 0.26        | 0.11  | 0.21    | 0.11    |
| <b>Sodium chloride g/100g</b>             | 0.65        | 0.28  | 0.53    | 0.28    |
| <b>Total sugars g/100g</b>                | 44.6        | 47.4  | 46      | 51.7    |
| <b>Nitrogen (mg/Kg) g/100g</b>            | 3           | 3.41  | 2.98    | 2.85    |
| <b>Protein g/100g</b>                     | 18.8        | 21.3  | 18.6    | 17.8    |
| <b>Monounsaturated fatty acids g/100g</b> | 2.35        | 3.13  | 3.84    | 1.81    |
| <b>Polyunsaturated fatty acids g/100g</b> | 2.5         | 0.25  | 0.27    | 0.25    |
| <b>Saturated fatty acids g/100g</b>       | 2.18        | 2.55  | 3.73    | 1.28    |
| <b>Dietary fibre g/100g</b>               | 5           | 6.3   | 6.3     | 7.1     |
| <b>Carbohydrate g/100g</b>                | 55.6        | 55.2  | 55.9    | 62      |
| <b>Energy kcal/100g</b>                   | 383         | 374   | 385     | 362     |
